# Supplementary material for: Structural and electronic evolution in the Cu3SbS4–Cu3SnS4solid solution
Source: Royal Society of Chemistry journal article supplement (doi:10.1039/d0tc01804j), 2020-01-01
Supplement: d0tc01804j1.pdf [file d0tc01804j1.pdf]

## Electronic Supplementary Information

### Structural and Electronic Evolution in the $\text{Cu}_3\text{SbS}_4$ - $\text{Cu}_3\text{SnS}_4$ Solid Solution

Kan Chen, Cono Di Paola, Savio Laricchia, Mike Reece, Cedric Weber, Emma McCabe, Isaac Abrahams and Nicola Bonini.

**Table S1.** Compositional analysis of representative samples  $\text{Cu}_3\text{SbS}_4(\text{BM})$ ,  $\text{Cu}_3\text{SbS}_4$ ,  $\text{Cu}_3\text{Sb}_{0.3}\text{Sn}_{0.7}\text{S}_4$  and  $\text{Cu}_3\text{SnS}_4$ . The Cu, Sb and Sn contents were determined by inductively coupled plasma optical emission spectrometry (ICP-OES) and the S content was determined by combustion analysis (LECO).

| Sample Name                                           |         | wt. % |      |      |      | Relative Density |
|-------------------------------------------------------|---------|-------|------|------|------|------------------|
|                                                       |         | Cu    | Sb   | Sn   | S    |                  |
| $\text{Cu}_3\text{SbS}_4(\text{BM})$                  | Nominal | 43.3  | 27.6 | -    | 29.1 | NA               |
|                                                       | Actual  | 43.4  | 27.2 |      | 29.4 |                  |
| $\text{Cu}_3\text{SbS}_4$                             | Nominal | 43.3  | 27.6 | -    | 29.1 | 98%              |
|                                                       | Actual  | 43.1  | 27.4 |      | 29.4 |                  |
| $\text{Cu}_3\text{Sb}_{0.3}\text{Sn}_{0.7}\text{S}_4$ | Nominal | 43.5  | 8.3  | 19.0 | 29.3 | 99%              |
|                                                       | Actual  | 43.4  | 8.2  | 18.9 | 29.5 |                  |
| $\text{Cu}_3\text{SnS}_4$                             | Nominal | 43.6  | -    | 27.1 | 29.3 | 100%             |
|                                                       | Actual  | 43.2  | -    | 27.3 | 29.5 |                  |

**Table S2.** Comparison of R-factors in ordered and disordered models for  $\text{Cu}_3\text{Sb}_{1-x}\text{Sn}_x\text{S}_4$  (bs = back scattering bank and la = low angle bank).

|                              |             | x = 0.0 | x = 0.4 | x = 0.7 | x = 1.0 |
|------------------------------|-------------|---------|---------|---------|---------|
| Ordered model<br>Sb/Sn in 2a | Rwp neut bs | 0.0227  | 0.0235  | 0.0230  | 0.0228  |
|                              | Rwp neut la | 0.0237  | 0.0271  | 0.0264  | 0.0296  |
|                              | Rwp X-ray   | 0.0956  | 0.0686  | 0.0704  | 0.1152  |
|                              | $\chi^2$    | 44.37   | 41.37   | 41.36   | 61.57   |
| Disordered model             | Rwp neut bs | 0.0228  | 0.0233  | 0.0230  | 0.0229  |
|                              | Rwp neut la | 0.0240  | 0.0268  | 0.0265  | 0.0296  |
|                              | Rwp X-ray   | 0.1124  | 0.0948  | 0.0831  | 0.1040  |
|                              | $\chi^2$    | 45.39   | 41.47   | 41.93   | 61.41   |

**Table S3.** Comparison of (a) R-factors, and (b) isotropic thermal parameters ( $\text{\AA}^2$ ) for different cation ordering models in  $\text{Cu}_3\text{SnS}_4$  (bs = back scattering bank and la = low angle bank).

Atomic positions: 2a = 0, 0, 0; 2b = 0, 0,  $\frac{1}{2}$ ; 4d = 0,  $\frac{1}{2}$ ,  $\frac{1}{4}$

(a)

| Model                      | Rwp neut bs | Rwp neut la | Rwp X-ray | $\chi^2$ |
|----------------------------|-------------|-------------|-----------|----------|
| 2: All Sn in 2a            | 0.0228      | 0.0296      | 0.1152    | 61.57    |
| 3: Sn in all sites varying | 0.0228      | 0.0296      | 0.1040    | 61.42    |
| 4: All Sn in 2b            | 0.0228      | 0.0296      | 0.1152    | 61.57    |
| 5: All Sn in 4d            | 0.0228      | 0.0297      | 0.1075    | 61.63    |
| 6: Sn in 2a and 2b         | 0.0228      | 0.0297      | 0.1075    | 61.56    |
| 7: Sn in 2a and 4d         | 0.0227      | 0.0296      | 0.1040    | 61.31    |
| 8: Sn in 2b and 4d         | 0.0227      | 0.0296      | 0.1040    | 61.33    |
| 9: Sn in all sites         | 0.0228      | 0.0296      | 0.1040    | 61.41    |

(b)

| Model                      | 2a      | 2b      | 4d      |
|----------------------------|---------|---------|---------|
| 2: All Sn in 2a            | 0.00977 | 0.02894 | 0.01627 |
| 3: Sn in all sites varying | 0.01067 | 0.02099 | 0.01690 |
| 4: All Sn in 2b            | 0.02927 | 0.00989 | 0.01612 |
| 5: All Sn in 4d            | 0.01267 | 0.01825 | 0.01982 |
| 6: Sn in 2a and 2b         | 0.01398 | 0.01613 | 0.02328 |
| 7: Sn in 2a and 4d         | 0.00940 | 0.01920 | 0.02067 |
| 8: Sn in 2b and 4d         | 0.01901 | 0.00957 | 0.02063 |
| 9: Sn in all sites         | 0.01045 | 0.01655 | 0.02131 |



(a)

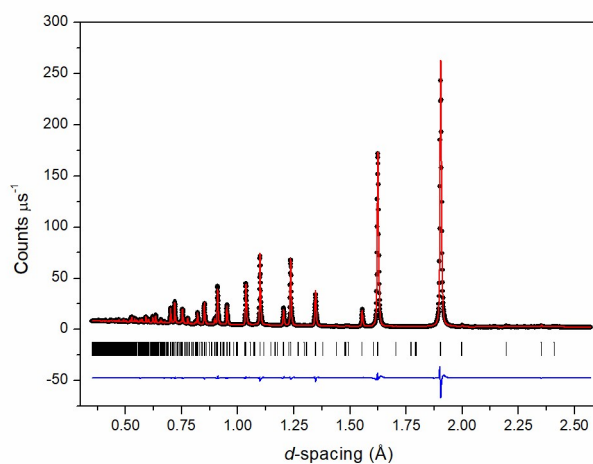

(b)

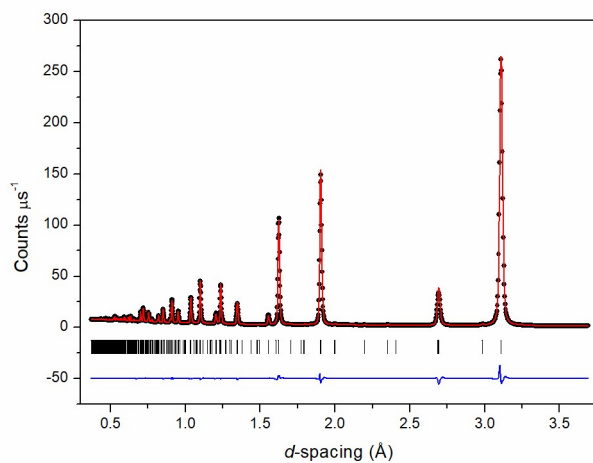

(c)

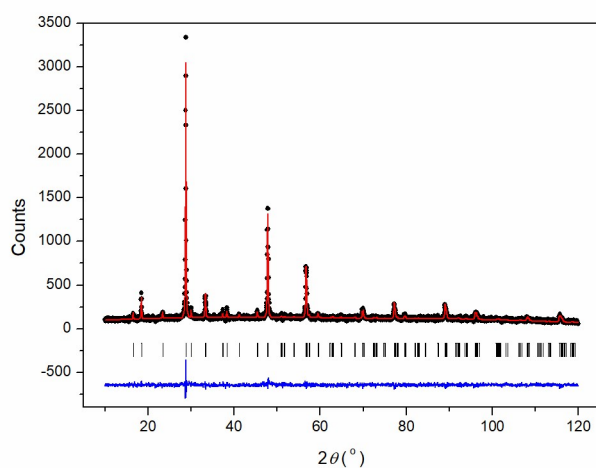

**Fig. S1.** Fitted diffraction profiles for  $\text{Cu}_3\text{SbS}_4$ : (a) neutron back-scattering; (b) neutron low-angle; and (c) X-ray data. Observed (circles), calculated (red line) and difference (blue) profiles are shown, with reflection positions indicated by markers.

(a)

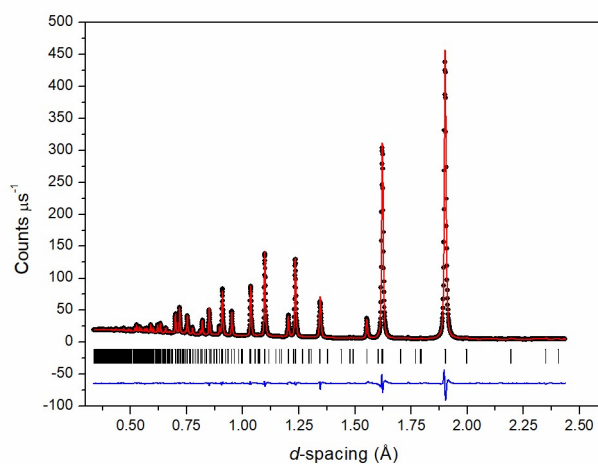

(b)

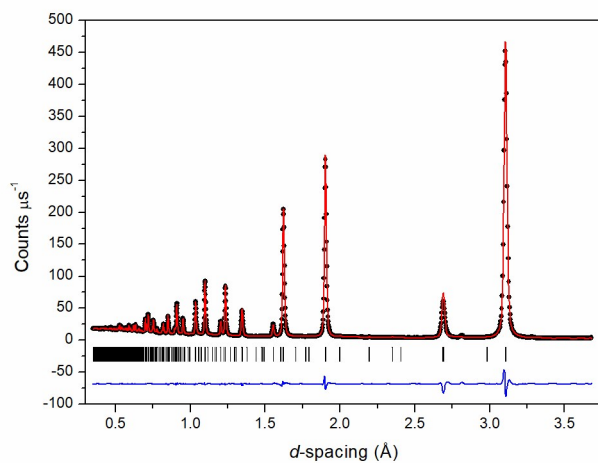

(c)

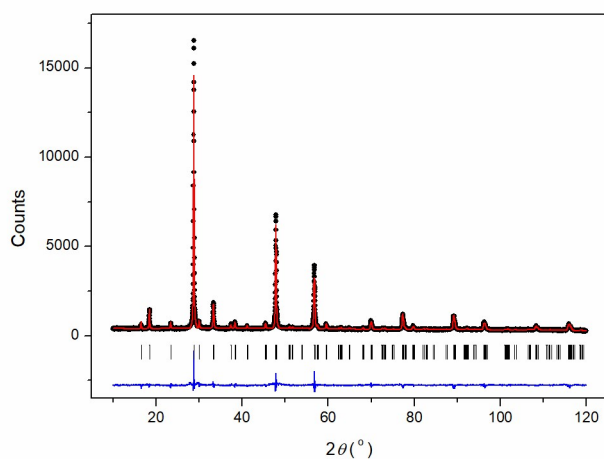

**Fig. S2.** Fitted diffraction profiles for  $\text{Cu}_3\text{Sb}_{0.6}\text{Sn}_{0.4}\text{S}_4$ : (a) neutron back-scattering; (b) neutron low-angle; and (c) X-ray data. Observed (circles), calculated (red line) and difference (blue) profiles are shown, with reflection positions indicated by markers.

(a)

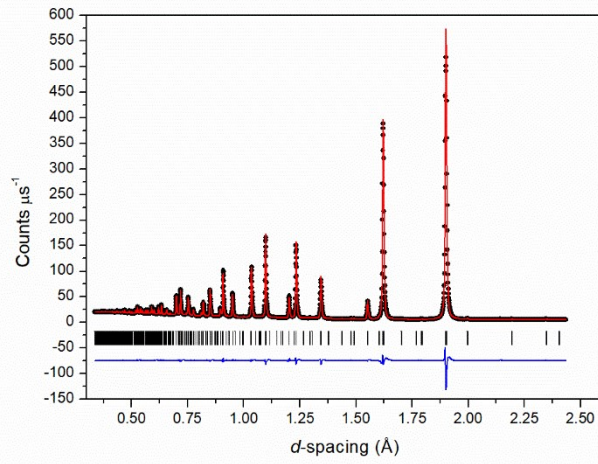

(b)

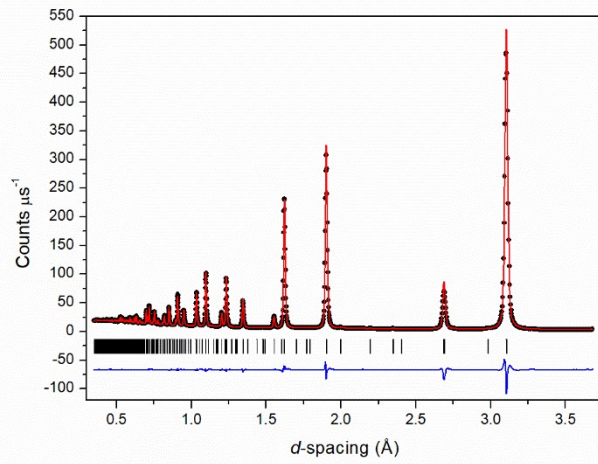

(c)

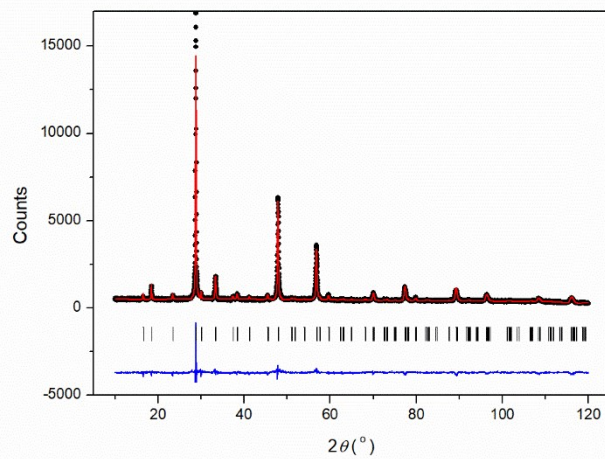

**Fig. S3.** Fitted diffraction profiles for  $\text{Cu}_3\text{Sb}_{0.3}\text{Sn}_{0.7}\text{S}_4$ : (a) neutron back-scattering; (b) neutron low-angle; and (c) X-ray data. Observed (circles), calculated (red line) and difference (blue) profiles are shown, with reflection positions indicated by markers.

(a)

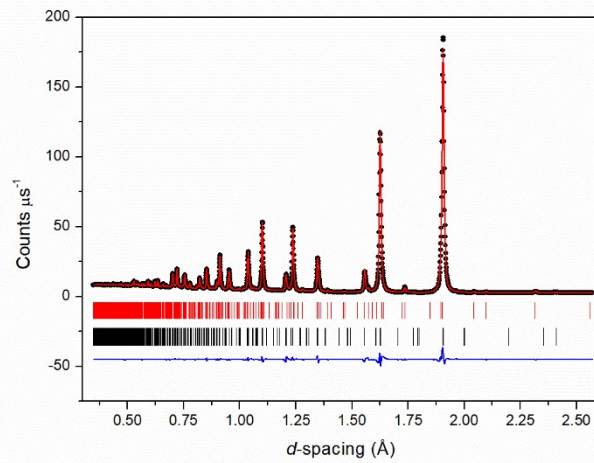

(b)

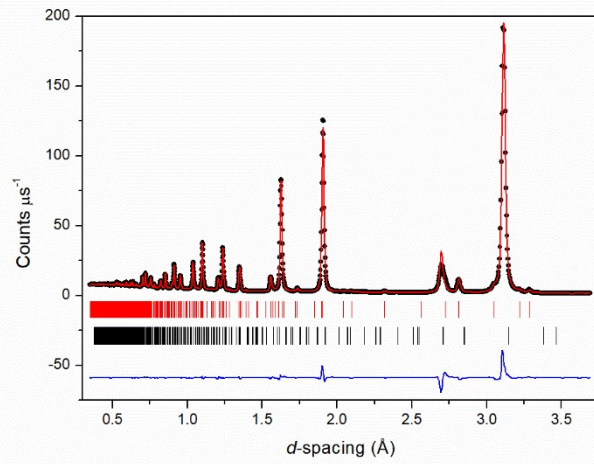

(c)

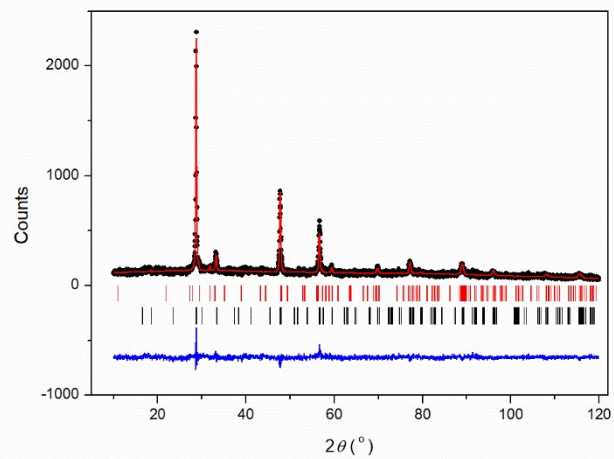

**Fig. S4.** Fitted diffraction profiles for  $\text{Cu}_3\text{SnS}_4$ : (a) neutron back-scattering; (b) neutron low-angle; and (c) X-ray data. Observed (circles), calculated (red line) and difference (blue) profiles are shown, with reflection positions indicated by markers  $\text{Cu}_3\text{SnS}_4$  (black),  $\text{CuS}$  (red).

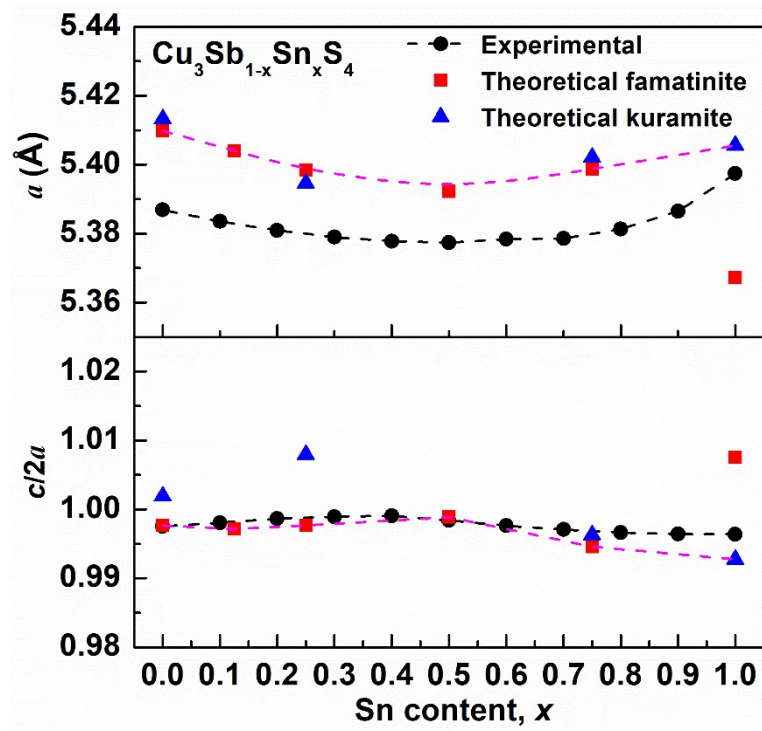

**Fig. S5.** Compositional variation of lattice parameter  $a$  (upper) and lattice parameter ratio,  $c/2a$  (lower).



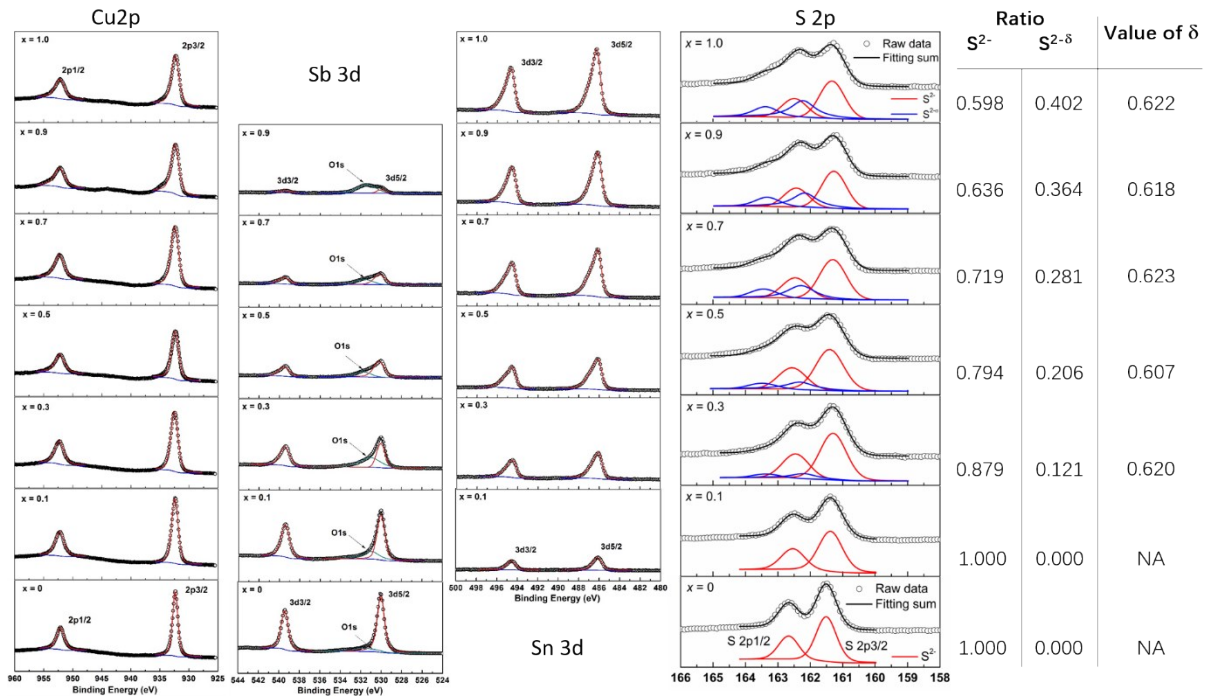

**Fig. S6.** Fitted high resolution XPS spectra for compositions in the  $Cu_3Sb_{1-x}Sn_xS_4$  system. All spectra were calibrated using C1s with a binding energy of 284.8 eV. For  $x = 0.3 \sim 1.0$  sample, S2p peaks were fitted into two different S species of  $S^{2-}$  and  $S^{2-\delta}$ . The ratio of  $S^{2-}$  and  $S^{2-\delta}$  and values of  $\delta$  were listed.
